# Supplementary material for: Stabilizing the ferroelectric phase in HfO2-based films sputtered from ceramic targets under ambient oxygen
Source: Royal Society of Chemistry journal article supplement (doi:10.1039/d0nr07699f), 2020-11-16
Supplement: d0nr07699f1.pdf [file d0nr07699f1.pdf]

### Supporting information

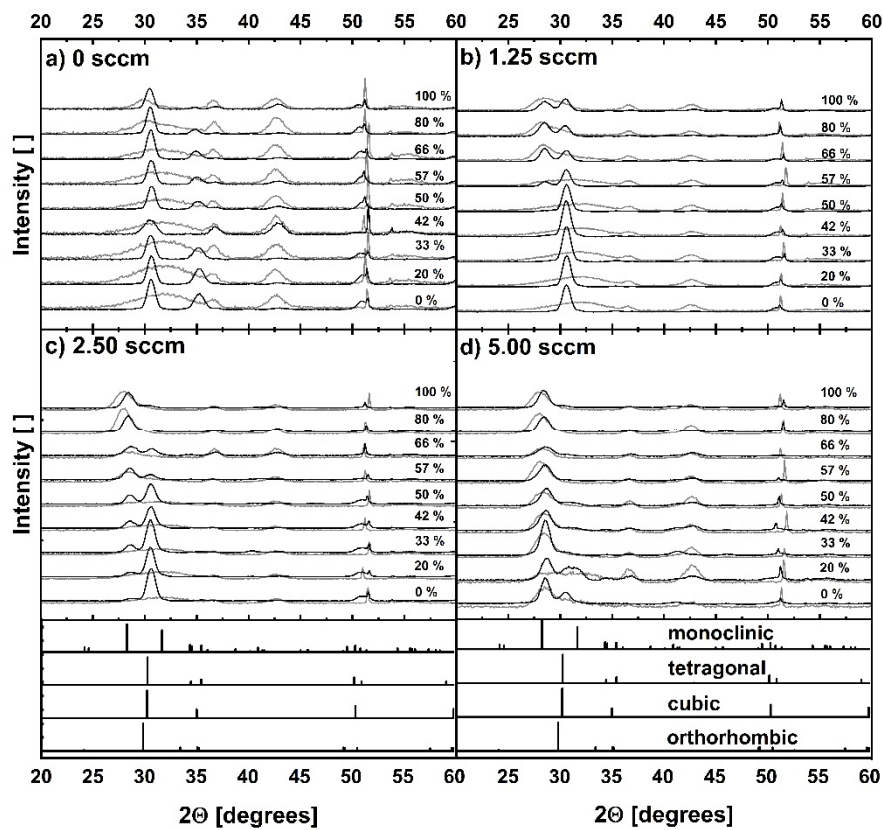

Figure SI 1 Complete set of GIXRD plots of  $\text{Hf}_{1-x}\text{Zr}_x\text{O}_2$  sputtered films under various oxygen ambient as deposited and after 800 °C anneal. The scale of as-deposited and annealed films is not true to scale for a better visibility of the as-deposited films.

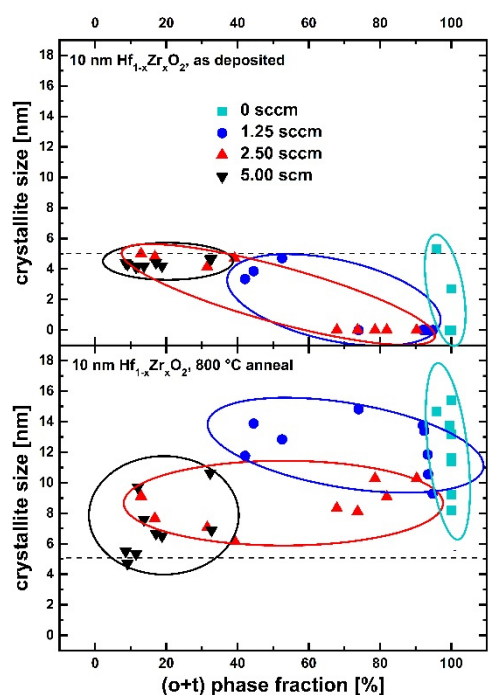

Figure SI 2 With Williams-Hall analysis determined crystallite diameter of the as deposited and 800 °C annealed films for the different (o+t)-phase fraction. Depending on oxygen concentration the dominant phase is used, 0 sccm flow and 1.25 sccm the 30.5 °  $\alpha(111)$  diffraction peaks.

The biaxial film stress (Figure 9 b) is calculated by the  $\sin^2(\Psi)$  method using the  $\alpha(111)$  peak.<sup>31,32</sup> Young's modulus of 284 GPa and a Poisson ratio of 0.6 is used.<sup>33</sup> Since with increasing oxygen amount the  $\alpha(111)$  signal becomes lower, the intensity is strongly decreasing when  $\Psi$  (angle between the surface normal and scattering vector) is increased. Therefore stress measurements became complicated and inaccurate. Thus the measurement is stopped at 2 sccm oxygen.

The unit cell volume in Figure SI 3 is calculated by using the GIXRD pattern of Figure SI 1 and the  $\alpha(111)$  and  $\alpha(002)$  peak. The unit cell volume is increasing for increasing oxygen and  $ZrO_2$  concentration. In the  $ZrO_2$  rich regime the unit cell in oxygen rich PVD is much higher than in stoichiometric ALD HZO. This is indicating a compressive stress induced by oxygen interstitials.

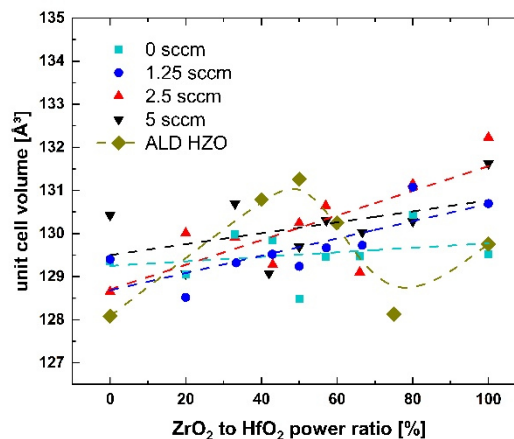

Figure SI 3 Comparison of the unit cell volume extracted from the GIXRD pattern of the sputtered  $Hf_{1-x}Zr_xO_2$  films and ALD deposited  $Hf_{1-x}Zr_xO_2$  films

From literature it is known, that increasing anneal temperatures in sputtered  $HfO_2$  and increasing oxygen supply during deposition increase the compressive film stress.<sup>51</sup> The compressive film stress in thin films can cause buckling and finally film delamination as observed in Figure 11 for oxygen and  $ZrO_2$  rich HZO films.<sup>52</sup> The expansion of the unit cell volume for higher oxygen supply shown in Figure SI 3 matches the DFT calculation indicating an incorporation of oxygen interstitials. An ALD reference  $Hf_{0.5}Zr_{0.5}O_2$  shows in the  $ZrO_2$  rich regime lower unit cell volumes and no general trend to increase with higher  $ZrO_2$  concentration. The stress effect might be higher in the sputtered films than in the ALD films since they have to be annealed at 800 °C whereas the ALD films are typically annealed at 600 °C. Additionally the density of the thin films is about ~20-30 % higher for the PVD deposited films compared to the ALD deposited films (Table SI 1). Higher film densities are well known to cause compressive strain.<sup>53</sup>

Table SI 1 Density of PVD and ALD deposited  $HfO_2$

|                                 | PVD 0<br>sccm | PVD 2<br>sccm | ALD 10 s | ALD 60 s |
|---------------------------------|---------------|---------------|----------|----------|
| Density<br>[g/cm <sup>3</sup> ] | 10.3          | 12.06         | 8.5      | 8.99     |

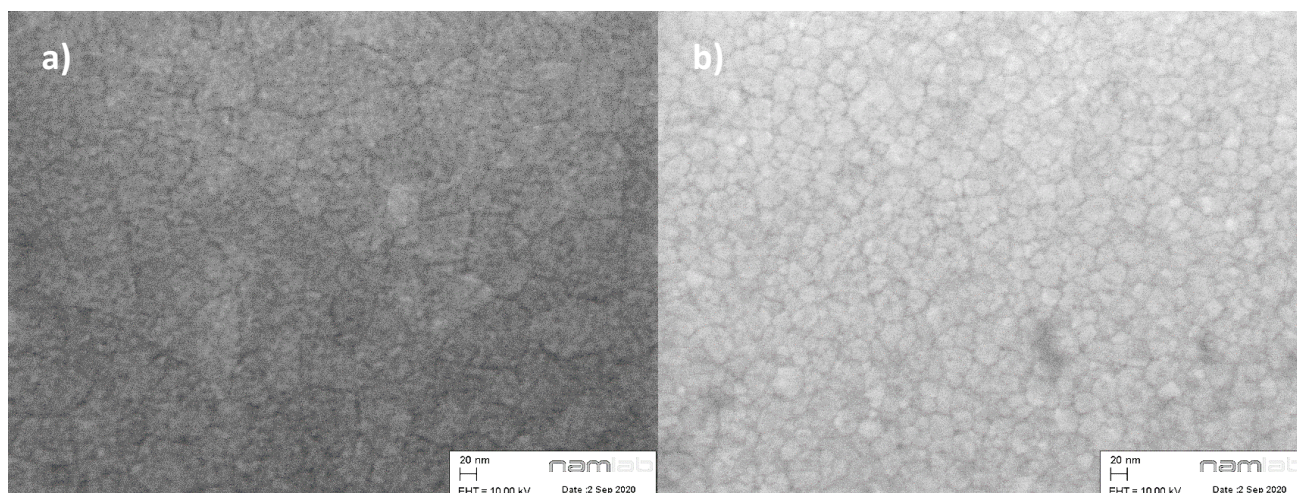

Figure SI 4 As captured top view SEM pictures of the 42 %  $\text{ZrO}_2$  ratio and at a) 0 sccm and b) 5 sccm oxygen flow

To measure the grain size of the annealed films residual  $\text{TiO}_x$  from the  $\text{TiN}$  top layer has to be removed. The samples were etched in 5 % hydrofluoric acid (HF) for 15 min to remove this  $\text{TiO}_x$ . Since the crystalline  $\text{HfO}_2$  has low etching rates in HF the  $\text{HfO}_2$  should not be affected strongly. The grain diameter was measured by Gwyddion software from the top view SEM pictures (Figure SI 44) after aligning the contrast and brightness.
